# Supplementary material
Source: publisher figshare collection journal article supplement (https://sage.figshare.com/ndownloader/files/20066288)
Supplement: Supplementary file 1 [file 20066288]

Supplemental Material

Figure S1. Overall risk of bias assessment using the Cochrane tool

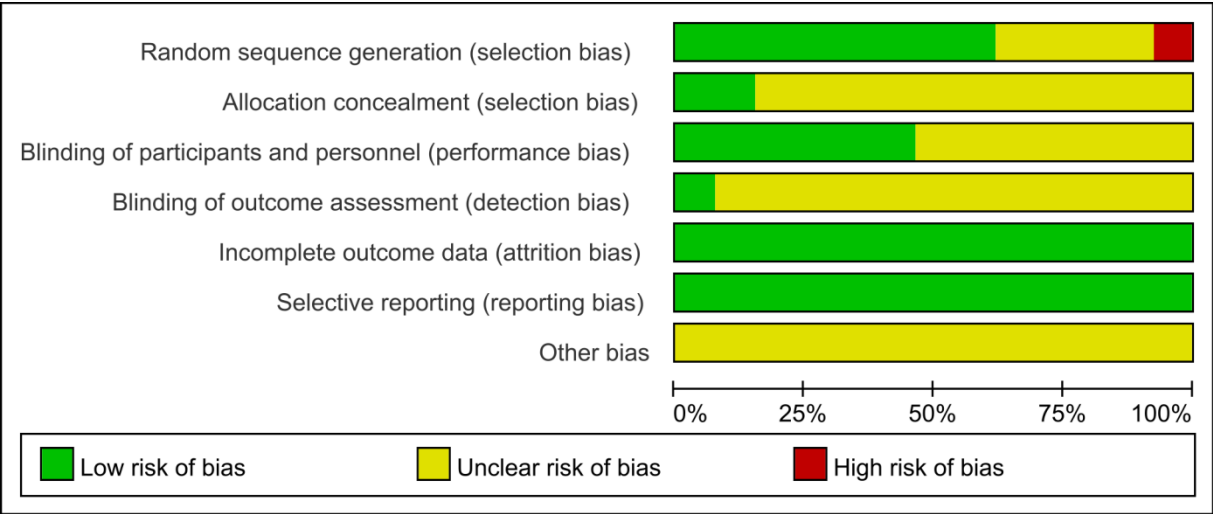

**Figure S2. Risk of bias assessment by individual trials**

|                   | Random sequence generation (selection bias) | Allocation concealment (selection bias) | Blinding of participants and personnel (performance bias) | Blinding of outcome assessment (detection bias) | Incomplete outcome data (attrition bias) | Selective reporting (reporting bias) | Other bias |
|-------------------|---------------------------------------------|-----------------------------------------|-----------------------------------------------------------|-------------------------------------------------|------------------------------------------|--------------------------------------|------------|
| Amanda P 2010     | +                                           | +                                       | +                                                         | ?                                               | +                                        | +                                    | ?          |
| Dinglan Wang 2010 | ?                                           | ?                                       | ?                                                         | ?                                               | +                                        | +                                    | ?          |
| Jianping Liu 2016 | ?                                           | ?                                       | ?                                                         | ?                                               | +                                        | +                                    | ?          |
| Jie Luo 2012      | ?                                           | ?                                       | ?                                                         | ?                                               | +                                        | +                                    | ?          |
| Jingxue Chen 2018 | +                                           | ?                                       | +                                                         | ?                                               | +                                        | +                                    | ?          |
| Jinxia Ding 2016  | -                                           | ?                                       | ?                                                         | ?                                               | +                                        | +                                    | ?          |
| Miao Zhang 2013   | +                                           | ?                                       | ?                                                         | ?                                               | +                                        | +                                    | ?          |
| Qin Huang 2010    | ?                                           | ?                                       | +                                                         | ?                                               | +                                        | +                                    | ?          |
| Roy 2017          | +                                           | +                                       | +                                                         | ?                                               | +                                        | +                                    | ?          |
| Shuli Zhou 2017   | +                                           | ?                                       | +                                                         | ?                                               | +                                        | +                                    | ?          |
| Yalin Li 2005     | +                                           | ?                                       | +                                                         | ?                                               | +                                        | +                                    | ?          |
| Yanli Zeng 2008   | +                                           | ?                                       | ?                                                         | +                                               | +                                        | +                                    | ?          |
| Ying Zhao 2014    | +                                           | ?                                       | ?                                                         | ?                                               | +                                        | +                                    | ?          |

| Appendix 1. Complete search strategy used for Medline |                                                                                                                                                                                                                                                                                                                                                                                                                                                                                      |
|-------------------------------------------------------|--------------------------------------------------------------------------------------------------------------------------------------------------------------------------------------------------------------------------------------------------------------------------------------------------------------------------------------------------------------------------------------------------------------------------------------------------------------------------------------|
| #1                                                    | Search ("self-management"[MeSh] OR "management" OR "self-care" OR "care" OR "managements" OR "manage" OR "manage, care" OR "self-government" OR "government" OR "government training" OR "management training" OR "care training")                                                                                                                                                                                                                                                   |
| #2                                                    | Search ("fatigue"[MeSh] OR "tired" OR "weak" OR "weakness" OR "asthenia" OR "feebleness" OR "infirmity" OR "debility" )                                                                                                                                                                                                                                                                                                                                                              |
| #3                                                    | Search ("neoplasms"[MeSh] OR "cancer" OR "tumor" OR "tumour" OR "carcino" OR "cancers" OR "tumors" OR "neoplasms" )                                                                                                                                                                                                                                                                                                                                                                  |
| #4                                                    | (Randomized controlled trial [pt] OR randomized controlled trials[pt] OR controlled clinical trial[mh] OR random allocation[mh] OR double-blind method[mh] OR single-blind method[mh] OR clinical trial[pt] OR clinical trials[mh] OR ("clinical trial"[tw]) OR ((singl*[tw] OR doubl*[tw] OR trebl*[tw] OR tripl*[tw])) AND (mask*[tw] OR blind*[tw])) OR ("latin square"[tw]) OR placebos[mh] OR placebo*[tw] OR random*[tw] OR research design[mh:noexp] OR follow-up studies[mh] |
| #5                                                    | Search (((#4) AND #3) AND ((#2))) AND #1                                                                                                                                                                                                                                                                                                                                                                                                                                             |
